# Supplementary material for: Treating Critically Ill Patients Experiencing SARS-CoV-2 Severe Infection with Ig-M and Ig-A Enriched Ig-G Infusion
Source: MDPI journal article supplement (doi:10.3390/antibiotics10080930), 2021-07-30
Supplement: s1 [file s1]

# Treating Critically Ill Patients Experiencing SARS-CoV-2 Severe Infection with Ig-M Enriched Ig-G Infusion

Alberto Corona MD \*, Giuseppe Richini, Sara Simoncini, Marta Zangrandi, Monica Biasini, Giuseppe Russo, Mauro Pasqua, Camilla Gregorini and Chiara Giordano

Accident & Emergency and Anaesthesia and Intensive Care Medicine Department, Esine and Edolo Hospitals, ASST Valcamonica, 25043 Brescia, Italy

## Supplementary Material 1

In the following tables we show all the recorded and analysed anamnestic, clinical, bioumoral, instrumental and ventilation parameters, both stratified according with groups and outcome.

**Table S1.** Quantitative variables stratified between treated and not treated.

| Variables                          | IgM-Enriched IgG Treated        | Not Treated                     | <i>p</i> -Value |
|------------------------------------|---------------------------------|---------------------------------|-----------------|
| Age (yrs.)                         | 59.5 (57-66)                    | 61(55-67)                       | 0.212           |
| SAPS II (score)                    | 45 (38-59)                      | 46 (38-58)                      | 0.222           |
| SOFA (score)                       | 9 (7-10)                        | 8 (5-11)                        | 0.174           |
| Pre-ICU-LOS (days)                 | 3 (1-5)                         | 4 (1-10.5)                      | 0.620           |
| ICU-LOS (days)                     | 15.5 (4.5-15.5)                 | 9 (4-11)                        | 0.045           |
| Urea (mg/dL)                       | 55 (40-109)                     | 48 (30-74)                      | 0.209           |
| Total bilirubin (mg/dL)            | 0.9 (0.6-1.9)                   | 1 (0.8-1.7)                     | 0.529           |
| Ammonium (mg/dL)                   | 76 (57-109)                     | 72 (53-100)                     | 0.335           |
| Total diuresis (L/die)             | 1.7 (1.2-2.2)                   | 1.7 (1.1-2.6)                   | 0.202           |
| PLT                                | 110*10 <sup>3</sup> (75-275)    | 105*10 <sup>3</sup> (86-233)    | 0.358           |
| LDH (mg/dL)                        | 525 (320-705)                   | 462 (272-563)                   | 0.478           |
| CPK (mg/dL)                        | 2239 (1140-2537)                | 3467 (2228-4185)                | 0.022           |
| D-Dimer (µg/dL)                    | 6485(1400-11.000)               | 10.7 (1.200-20000)              | 0.110           |
| Worse CRP (mg/dL)                  | 265 (165-370)                   | 226 (87-287)                    | 0.087           |
| Worse PCT (ng/dL)                  | 3.6 (0.6-7.4)                   | 4.16 (0.5-8.9)                  | 0.075           |
| Worse WBC (mg/dL)                  | 20.2*10 <sup>3</sup> (6.4-32.3) | 19.3*10 <sup>3</sup> (5.9-27.2) | 0.334           |
| Ferritinaemia (mg/dL)              | 5.9 (1.2-7.8)                   | 7.0 (1.3-8.1)                   | 0.447           |
| Albumin (g/L)                      | 2.3 (2.1-3.8)                   | 2.2 (2.1-3.6)                   | 0.652           |
| Worst Temperature (°C)             | 39.5 (37.8-40.1)                | 39.3 (37.7-39.8)                | 0.233           |
| IgG-pre (mg/dL) [range 7.5-15.6]   | 10 (7-14.5)                     | 10.6 (6.8-14.6)                 | 0.233           |
| IgG-post (mg/dL) [range 7.5-15.6]  | 11.4 (7.6-15.4)                 | 9.8 (7.8-14)                    | 0.065           |
| IgA-pre (mg/dL) [range 0.82-4.53]  | 0.8 (0.7-3.1)                   | 0.9 (0.8-3)                     | 0.125           |
| IgA-post (mg/dL) [range 0.82-4.53] | 1.8 (1-3.8)                     | 1 (0.75-1.9)                    | 0.086           |
| IgM-pre (mg/dL) [range 0.46-3.04]  | 0.5 (0.4-1.5)                   | 0.6 (0.4-1.6)                   | 0.276           |
| IgM-post (mg/dL) [range 0.46-3.04] | 1.2 (0.6-2.6)                   | 0.7 (0.5-1.9)                   | 0.071           |
| TC involvement (%)                 | 75 (45-88.75)                   | 65 (30-72.5)                    | 0.115           |
| Recruiting Maneuvres (#)           | 1 (1-2)                         | 1 (1-2)                         | 1               |
| Muscle block duration (days)       | 3.5 (2-6)                       | 3 (2.5-5.5)                     | 0.122           |
| Min-PEEP (cmH <sub>2</sub> O)      | 10 (5-14)                       | 10.5 (8-12.5)                   | 0.224           |
| Max-PEEP (cmH <sub>2</sub> O)      | 16 (15-18)                      | 15 (13.5-18)                    | 0.405           |

|                                                    |                  |                  |       |
|----------------------------------------------------|------------------|------------------|-------|
| Worse PaO <sub>2</sub> /FiO <sub>2</sub> ratio (#) | 116 (86-176)     | 120 (74-230)     | 0.725 |
| pre intubation                                     |                  |                  |       |
| pH (#)                                             | 7.48 (7.37-7.48) | 7.47 (7.42-7.49) | 0.9   |
| pCO <sub>2</sub> (mmHg)                            | 34 (30-38)       | 36 (28-40)       | 0.1   |
| PaO <sub>2</sub> /FiO <sub>2</sub> (#)             | 84 (66-166.5)    | 110 (63-157)     | 0.09  |
| Lactates (mMol/L)                                  | 2.3 (1.5-3)      | 1.6 (1.2-2.5)    | 0.068 |
| post intubation                                    |                  |                  |       |
| pH (#)                                             | 7.37 (7.31-7.42) | 7.38 (7.28-7.46) | 0.212 |
| pCO <sub>2</sub> (mmHg)                            | 42 (37-47)       | 43 (32-52)       | 0.234 |
| PaO <sub>2</sub> /FiO <sub>2</sub> (#)             | 155 (105-191)    | 165 (116-205)    | 0.181 |
| Lactates (mMol/L)                                  | 1.4 (1.2-1.98)   | 1.4 (1.1 – 2.7)  | 0.460 |
| PEEP (cmH <sub>2</sub> O)                          | 15 (13.75-16.5)  | 12.5 (11.75-15)  | 0.613 |
| 1 <sup>st</sup> pronation                          |                  |                  |       |
| pH (#)                                             | 7.32 (7.25-7.42) | 7.26 (7.20-7.34) | 0.246 |
| pCO <sub>2</sub> (mmHg)                            | 46 (45-61)       | 50 (43-73)       | 0.659 |
| PaO <sub>2</sub> /FiO <sub>2</sub> (#)             | 127 (97-162)     | 210 (126-288)    | 0.328 |
| Lactates (mMol/L)                                  | 1.9 (1.6-2)      | 1.6 (1.1-2.6)    | 0.659 |
| PEEP (cmH <sub>2</sub> O)                          | 15 (13.75-16.5)  | 12.5 (11.75-15)  | 0.613 |
| 1 <sup>st</sup> re-supination                      |                  |                  |       |
| pH (#)                                             | 7.32 (7.20-7.42) | 7.33 (7.26-7.4)  | 1     |
| pCO <sub>2</sub> (mmHg)                            | 48 (39-61)       | 51 (44-61)       | 0.681 |
| PaO <sub>2</sub> /FiO <sub>2</sub> (#)             | 142 (100-202)    | 181 (91-218)     | 0.837 |
| Lactates (mMol/L)                                  | 2.2 (1.9-2.7)    | 1.9 (1.1-2.2)    | 0.174 |
| PEEP (cmH <sub>2</sub> O)                          | 12 (10-16)       | 12 (10-14)       | 0.545 |
| 2 <sup>nd</sup> pronation                          |                  |                  |       |
| pH (#)                                             | 7.38 (7.33-7.43) | 7.35 (7.33-7.37) | 0.476 |
| pCO <sub>2</sub> (mmHg)                            | 48 (36-57)       | 52 (43-56)       | 0.914 |
| PaO <sub>2</sub> /FiO <sub>2</sub> (#)             | 174 (125-233)    | 89 (72-223)      | 0.044 |
| Lactates (mMol/L)                                  | 1.7 (1.4-2.6)    | 1.3 (1.2-2.6)    | 0.476 |
| PEEP (cmH <sub>2</sub> O)                          | 12 (10-14)       | 12 (10-14)       | 1     |
| 2 <sup>nd</sup> re-supination                      |                  |                  |       |
| pH (#)                                             | 7.43 (7.39-7.45) | 7.37 (7.31-7.53) | 0.475 |
| pCO <sub>2</sub> (mmHg)                            | 45 (42-50)       | 50 (34-64)       | 0.914 |
| PaO <sub>2</sub> /FiO <sub>2</sub> (#)             | 132 (70-107)     | 195 (157-202)    | 0.048 |
| Lactates (mMol/L)                                  | 2 (1.5-2.4)      | 1.8 (1-2.2)      | 0.610 |
| PEEP (cmH <sub>2</sub> O)                          | 10 (10-12)       | 10 (8-12)        | 0.884 |
| Worse GCS (#)                                      | 15 (15-15)       | 15 (15-15)       | 1     |
| MV-length (days)                                   | 12 (9-15)        | 7 (5-9)          | 0.045 |
| Tracheostomy timing (days)                         | 12 (7-18)        | 12 (6.75-15)     | 0.225 |
| Expected Mortality (days)                          | 34 (30-43)       | 35 (22-45)       | 0.137 |

**Legend:** (#): absolute number.

**Table S2.** Categorical variables stratified between treated and not treated.

| Variables                     | IgM-enriched IgG Treated | Not Treated | OR (95% CI)   | p-Value |
|-------------------------------|--------------------------|-------------|---------------|---------|
| IDDM/NIDDM                    | 2 (8.3%)                 | 2 (8.7%)    | 1 (0.2-7.9)   | 1       |
| Smoke                         | 2 (8.3%)                 | 0           | n.a.          | 0.488   |
| COPD & other lung pathologies | 2 (8.3%)                 | 4 (17.4%)   | 0.4 (0.1-2.6) | 0.416   |
| Chronic Renal failure         | 1 (4.2%)                 | 0           | n.a.          | 1       |
| Chronic Liver failure         | 0                        | 0           | n.a           | n.a.    |

|                                     |            |            |                |       |
|-------------------------------------|------------|------------|----------------|-------|
| Steroid therapy & immunosuppression | 0          | 2 (8.7%)   | n.a.           | 0.234 |
| Hypertension                        | 12 (50%)   | 7 (33.3%)  |                |       |
| CAD                                 | 4(16.7%)   | 1 (4.3%)   | 4.7 (0.5-6.2)  | 0.343 |
| Other Cardiopathies                 | 2 (8.3%)   | 2 (8.7%)   | 0.9 (0.1-7.4)  | 1     |
| Cerebral Stroke                     | 1 (4.2%)   | 0          | n.a.           | 1     |
| Neoplasia                           | 1 (4.2%)   | 0          | n.a.           | 1     |
| Vasoactive drugs                    | 17 (70.8%) | 13 (56.5%) | 2.6 (0.5-12.4) | 0.273 |
| Antiviral Therapy (*)               |            |            |                |       |
| Hydroxychloroquine                  | 7 (29.2%)  | 10 (43.5%) | 0.6 (0.2-1.9)  | 0.530 |
| Lopinavir/ritonavir                 | 6 (25%)    | 5 (21.7%)  | 1.3 (0.3-5.1)  | 1     |
| Steroids                            | 3 (12.5%)  | 10 (43.5%) | 0.2 (0.1-0.9)  | 0.043 |
| Azithromycin                        | 7 (29.2%)  | 6 (26.1%)  | 1.3 (0.3-4.6)  | 1     |
| ASA                                 | 2 (8.3%)   | 2 (8.7%)   | 1 (0.2-7.9)    | 1     |
| Heparin sodium 4000 IU/daily        | 4 (16.7%)  | 5 (21.7%)  | 0.7 (0.2-3.1)  | 0.719 |
| Heparin sodium 4000 IU b.i.d.       | 1 (4.2%)   | 1 (4.3%)   | 1 (0.05-17.1)  | 1     |
| Heparin calcium 25.000 IU/daily     | 1 (4.2%)   | 1 (4.3%)   | 1 (0.05-17.1)  | 1     |
| O.A.T.                              | 1 (4.2%)   | 0          | n.a.           | 1     |
| Pulmonary Embolism                  | 3 (12.5%)  | 6 (26.1%)  | 0.4 (0.2-1.8)  | 0.277 |
| Acute Kidney failure                | 10 (41.7%) | 3 (13%)    | 5.1 (1.2-23)   | 0.043 |
| CRRT                                | 4 (16.7%)  | 1 (4.3%)   | 4.9 (0.5-48.4) | 0.185 |
| Acute liver failure                 | 10 (41.7%) | 5 (21.7)   | 2.7 (0.8-10.2) | 0.197 |
| Acute cerebral stroke               | 2 (8.3%)   | 2 (8.7%)   | 0.9 (0.1-7.5)  | 1     |
| Infection rate                      | 5 (20.8%)  | 9 (39.1%)  | 0.6 (0.1-1.3)  | 0.116 |
| Septic shock                        | 5 (20.8%)  | 7 (21.7%)  | 0.7 (0.2-5)    | 0.329 |

Legend: (\*) pre-admission to ICU; in case of presence of slash /: at least 1 variable in each two way table upon which measures of association are computed is a constant; OR: the Mantel-Haenszel statistic is applied as well as the conditional assumption of independence. OR are computed as IgM-enriched IgG treated vs. not treated. Data of categorical variables are given in percentage.

**Table 3.** Quantitative variables stratified between treated and not treated and according with the outcome.

| Variables               | IgM Enriched IgG              |                               |         | Not Treated                   |                              |         |
|-------------------------|-------------------------------|-------------------------------|---------|-------------------------------|------------------------------|---------|
|                         | Survived                      | Dead                          | p-Value | Survived                      | Dead                         | p-Value |
| Age (yrs.)              | 58.5 (55-61.5)                | 63.5 (58-75)                  | 0.051   | 56 (48-66)                    | 66 (63-71)                   | 0.043   |
| BMI (#)                 | 27 (24-30)                    | 31 (58-75)                    | 0.095   | 24 (24-29)                    | 27 (24-29)                   | 0.387   |
| SAPS II (score)         | 42 (38-51)                    | 43.5 (39-48)                  | 0.605   | 46 (37-55)                    | 47 (46-62)                   | 0.331   |
| SOFA (score)            | 9 (7-10)                      | 9 (7.5-10)                    | 0.941   | 8 (7-10)                      | 9 (8-12)                     | 0.080   |
| Pre-ICU-LOS (days)      | 3 (1-5)                       | 1 (1-6.5)                     | 0.917   | 4 (2-7)                       | 7.5 (1-10)                   | 0.539   |
| ICU-LOS (days)          | 12 (5-18.5)                   | 10 (4-15)                     | 0.563   | 7 (6-15)                      | 5.5 (3-11)                   | 0.851   |
| Urea (mg/dL)            | 40 (35-72)                    | 62 (47-115)                   | 0.095   | 50 (29-76)                    | 60 (44-80)                   | 0.360   |
| Total bilirubin (mg/dL) | 0.87 (0.65-2.37)              | 1 (0.6-1.6)                   | 0.824   | 1.6 (0.8-1.35)                | 1.7 (0.7-1.8)                | 0.863   |
| Ammonium (mg/dL)        | 76 (57-109)                   | 78 (65-117)                   | 0.624   | 52 (46-59)                    | 94 (72-107)                  | 0.036   |
| PLT (#)                 | 236*10 <sup>3</sup> (198-275) | 175*10 <sup>3</sup> (145-240) | 0.176   | 183*10 <sup>3</sup> (140-281) | 140*10 <sup>3</sup> (91-192) | 0.123   |
| LDH (mg/dL)             | 443 (321-606)                 | 569 (519-766)                 | 0.112   | 319 (229-479)                 | 503 (436-566)                | 0.025   |
| CPK (mg/dL)             | 69 (24-484)                   | 245 (92-728)                  | 0.370   | 73 (30-273)                   | 93 (23-185)                  | 0.863   |
| D-Dimer (µg/dL)         | 5140 (770-13570)              | 1200 (965-2005)               | 0.360   | 1770 (620-11080)              | 14950 (2780-20000)           | 0.041   |
| CRP (mg/dL)             | 273 (150-305)                 | 297 (180-317)                 | 0.552   | 131 (63-170)                  | 115 (93-220)                 | 0.654   |
| PCT (ng/dL)             | 0.59 (0.13-1)                 | 1.2 (0.15-1.9)                | 0.270   | 0.33 (0.13-1)                 | 0.53 (0.15-4.3)              | 0.055   |

|                                                       |                   |                    |       |                   |                    |       |
|-------------------------------------------------------|-------------------|--------------------|-------|-------------------|--------------------|-------|
| WBC (#)                                               | 8750 (6000-11300) | 10300 (6730-17900) | 0.656 | 7390 (4900-11080) | 12700 (7300-18540) | 0.314 |
| Ferritinaemia (mg/dL)                                 | 1865 (785-3898)   | 2283 (1351-4485)   | 0.297 | 1661 (1206-2107)  | 4036 (1230-10933)  | 0.174 |
| Albumin (g/L)                                         | 3.3 (2.9-3.8)     | 3.3 (3.1-3.6)      | 0.876 | 3.5 (2.9-4.1)     | 3.3 (3.1-3.5)      | 0.310 |
| Worst Temperature (°C)                                | 37.5 (37-38.5)    | 38.2 (36.9-38.8)   | 0.780 | 37 (36.8-37.9)    | 37 (36.8-38.3)     | 0.829 |
| IgG-pre (mg/dL)<br>[range 7.5-15.6]                   | 10.5 (7-15)       | 10 (6.9-14.6)      | 0.443 | /                 | /                  | /     |
| IgG-post (mg/dL)<br>[range 7.5-15.6]                  | 11.4 (7.8-14.4)   | 9.8 (7.8-14)       | 0.554 | /                 | /                  | /     |
| IgA-pre (mg/dL)<br>[range 0.82-4.53]                  | 1.1 (0.7-3.1)     | 0.8 (0.8-2.1)      | 0.294 | /                 | /                  | /     |
| IgA-post (mg/dL)<br>[range 0.82-4.53]                 | 1.8 (1-3.8)       | 0.9 (0.75-1.9)     | 0.187 | /                 | /                  | /     |
| IgM-pre (mg/dL)<br>[range 0.46-3.04]                  | 1.1 (0.6-2.1)     | 0.9 (0.5-1.7)      | 0.254 | /                 | /                  | /     |
| IgM-post (mg/dL)<br>[range 0.46-3.04]                 | 1.2 (0.7-2)       | 1 (0.55-1.9)       | 0.234 | /                 | /                  | /     |
| TC involvement (%)                                    | 75 (45-88.75)     | 65 (30-72.5)       | 0.115 | 50 (25-70)        | 55 (30-78)         | 0.418 |
| Recruiting<br>Manoeuvres (#)                          | 2 (2-4)           | 4 (2-4)            | 0.980 | 2 (2-4)           | 4 (2-4)            | 0.980 |
| Prone-supinations (#)                                 | 2 (2-3)           | 2 (2-3)            | 0.988 | 2 (2-3)           | 2 (2-3)            | 0.988 |
| Muscle block duration<br>(days)                       | 3 (3-5)           | 4 (1-6)            | 0.930 | 2 (2-3)           | 2 (2-3)            | 0.988 |
| Min-PEEP (cmH <sub>2</sub> O)                         | 14 (13-15)        | 14 (13-15)         | 0.752 | 11 (8-14)         | 12 (9-12.5)        | 0.489 |
| Max-PEEP (cmH <sub>2</sub> O)                         | 16 (15-18)        | 18 (15-20)         | 0.206 | 15 (12-18)        | 15 (13-18)         | 0.730 |
| Worse PaO <sub>2</sub> /FiO <sub>2</sub> ratio<br>(#) | 137 (82-106)      | 92 (92-111)        | 0.010 | 119 (85-180)      | 85 (57-139)        | 0.040 |
| Worse GCS (#)                                         | 15 (15-15)        | 15 (15-15)         | 1     | 15 (15-15)        | 15 (15-15)         | 1     |
| pre intubation<br>pH (#)                              | 7.44 (7.43-7.48)  | 7.38 (7.27-7.49)   | 0.497 | 7.47 (7.43-7.50)  | 7.38 (7.39-7.49)   | 0.654 |
| pCO <sub>2</sub> (mmHg)                               | 54 (42-68)        | 38 (33-41)         | 0.065 | 37 (27-41)        | 32 (28-39)         | 0.756 |
| PaO <sub>2</sub> /FiO <sub>2</sub> ratio (#)          | 129 (99-197)      | 66 (50-76.5)       | 0.001 | 151 (105-190)     | 91 (53-117)        | 0.029 |
| Lactates (mMol/L)                                     | 1.6 (1.2-2.4)     | 3 (2.2-6.7)        | 0.013 | 1.2 (1-1.8)       | 2.2 (1.6-3)        | 0.016 |
| post intubation<br>pH (#)                             | 7.39 (7.35-7.43)  | 7.33 (7.26-7.39)   | 0.021 | 7.44 (7.36-7.52)  | 7.32 (7.25-7.43)   | 0.012 |
| pCO <sub>2</sub> (mmHg)                               | 38 (37-46)        | 45 (42-49)         | 0.083 | 37 (26-40)        | 44 (41-54)         | 0.020 |
| PaO <sub>2</sub> /FiO <sub>2</sub> ratio (#)          | 182 (134-191)     | 110 (70-190)       | 0.146 | 230 (110-240)     | 119 (82-170)       | 0.016 |
| Lactate (mMol/L)                                      | 1.3 (1-1.6)       | 1.95 (1.5-3.7)     | 0.019 | 1.2 (1-2.1)       | 1.7 (1.3-3)        | 0.230 |
| PEEP cmH <sub>2</sub> O)                              | 15 (12-16)        | 15.5 (14-18)       | 0.860 | 15 (12-15)        | 12 (10-15)         | 0.515 |
| 1 <sup>st</sup> pronation<br>pH (#)                   | 7.39 (7.25-7.47)  | 7.27 (7.18-7.36)   | 0.082 | 7.27 (7.18-7.37)  | 7.27 (7.21-7.33)   | 1     |
| pCO <sub>2</sub> (mmHg)                               | 45 (40-60)        | 52 (44-62)         | 0.792 | 68 (50-85)        | 49 (39-62)         | 0.301 |
| PaO <sub>2</sub> /FiO <sub>2</sub> ratio (#)          | 165 (115-235)     | 118 (82.5-155)     | 0.177 | 170 (126-220)     | 126 (80-220)       | 0.857 |
| Lactate (mMol/L)                                      | 1.7 (1.5-2.3)     | 1.8 (1.3-2.7)      | 0.792 | 1.8 (1-2.6)       | 1.7 (1.2-2.6)      | 0.857 |
| PEEP (cmH <sub>2</sub> O)                             | 15 (12-16)        | 15.5 (14-18)       | 0.860 | 15 (12-18)        | 15 (14-16)         | 0.755 |
| 1 <sup>st</sup> re-supination<br>pH (#)               | 7.40 (7.28-7.50)  | 7.27 (7.15-7.38)   | 0.111 | 7.33 (7.26-7.40)  | 7.33 (7.29-7.38)   | 0.857 |
| pCO <sub>2</sub> (mmHg)                               | 40 (28-60)        | 51 (46-63)         | 0.286 | 60(54-66)         | 50 (43-56)         | 0.190 |
| PaO <sub>2</sub> /FiO <sub>2</sub> ratio (#)          | 192 (140-225)     | 102 (80-165)       | 0.111 | 257 (137-370)     | 181 (67-202)       | 0.571 |
| Lactates (mMol/L)                                     | 1.9 (1.6-2.2)     | 2.7 (2.3-3)        | 0.063 | 1.1 (0.75-1.45)   | 2.2 (1.4-3.1)      | 0.190 |
| PEEP (cmH <sub>2</sub> O)                             | 15 (12-16)        | 15.5 (14-18)       | 0.860 | 15 (14-16)        | 15 (14-16)         | 0.755 |

| 15 (12-18)                                   |                  |                  |       |                  |                  |       |
|----------------------------------------------|------------------|------------------|-------|------------------|------------------|-------|
| 2 <sup>nd</sup> pronation                    |                  |                  |       |                  |                  |       |
| pH (#)                                       | 7.40 (7.34-7.47) | 7.36 (7.30-7.42) | 0.700 | 7.33 (7.33-7.33) | 7.36 (7.34-7.38) | 0.500 |
| pCO <sub>2</sub> (mmHg)                      | 48 (37-53)       | 57 (34-58)       | 0.400 | 51 (50-55)       | 52 (39-57)       | 1     |
| PaO <sub>2</sub> /FiO <sub>2</sub> ratio (#) | 138 (86-245)     | 200 (150-225)    | 0.700 | 139 (110-150)    | 197 (115-330)    | 0.500 |
| Lactates (mMol/L)                            | 1.8 (1.2-2.9)    | 1.9 (1.4-2.4)    | 1     | 1.2 (1.1-2)      | 1.9 (1.3-3.0)    | 0.500 |
| PEEP (cmH <sub>2</sub> O)                    | 15 (14-16)       | 15.5 (14-18)     | 0.860 | 15 (12-18)       | 15 (14-16)       | 0.755 |
| 2 <sup>nd</sup> re-supination                |                  |                  |       |                  |                  |       |
| pH (#)                                       | 7.44 (7.40-7.45) | 7.43 (7.36-7.45) | 0.700 | 7.30 (7.30-7.33) | 7.44 (7.32-7.43) | 0.550 |
| pCO <sub>2</sub> (mmHg)                      | 44 (37-55)       | 45.7 (45-47.8)   | 0.700 | 66 (57-70)       | 45 (30-55)       | 0.478 |
| PaO <sub>2</sub> /FiO <sub>2</sub> ratio (#) | 137 (82-106)     | 100 (96-150)     | 0.400 | 200 (180-220)    | 102 (95-138)     | 0.500 |
| Lactates (mMol/L)                            | 1.9 (1.1-3)      | 2.2. (1.9-2-2)   | 0.700 | 1 (0.8-2)        | 1.9 (1.7-2.3)    | 0.500 |
| PEEP (cmH <sub>2</sub> O)                    | 14 (12-16)       | 14 (12-16)       | 1     | 14 (12-15)       | 14 (12-15)       | 1     |
| MV-length (days)                             | 11 (4-19)        | 9 (4-13)         | 0.186 | 10 (5-18.5)      | 8 (7-11)         | 0.043 |
| Tracheostomy timing (days)                   | 16.5 (9-27)      | 11 (5-13)        | 0.229 | 7 (6-11)         | 6 (5-7)          | 0.778 |
| Expected Mortality (days)                    | 30 (21-48)       | 30 (23-42)       | 0.605 | 32 (17-41)       | 34 (30-39)       | 0.310 |

**Table S4.** Categorical variables stratified between treated and not treated and according with the outcome.

| Variables                           | IgM Enriched IgG Treated |           |                |         | Not Treated |           |                 |         |
|-------------------------------------|--------------------------|-----------|----------------|---------|-------------|-----------|-----------------|---------|
|                                     | Survived                 | Dead      | OR (95% CI)    | p-Value | Survived    | Dead      | OR (95% CI)     | p-Value |
| IDDM/NIDDM                          | 1 (7.1%)                 | 1 (10%)   | 0.7 (0.1-13.4) | 1       | 1 (10%)     | 1 (7.7%)  | 1.1 (0.1-20.5)  | 1       |
| Smoke                               | 2 (14.3%)                | 1 (10%)   | 2 (0.6-2.2)    | 0.486   | 0           | 2 (15.4%) | 0.4 (0.1-4.2)   | 0.604   |
| COPD & Other lung pathologies       | 2 (14.3%)                | 0         | n.a.           | 0.493   | 1 (10%)     | 3 (23.1%) |                 |         |
| Chronic Renal failure               | 0                        | 1 (10%)   | n.a.           | 0.429   | 0           | 0         | n.a.            | n.a.    |
| Chronic Liver failure               | 0                        | 0         | n.a.           | n.a.    | 0           | 0         | n.a.            | n.a.    |
| Steroid therapy & Immunosuppression | 0                        | 0         | n.a.           | n.a.    | 0           | 2 (15.4%) | n.a.            | 0.486   |
| Hypertension                        | 7 (50%)                  | 5 (50%)   | 1.2 (0.2-6.4)  | 1       | 2 (20%)     | 5 (38.5%) | 0.3 (0.1-2.1)   | 0.361   |
| CAD                                 | 2 (14.3%)                | 2 (20%)   | 0.7 (0.1-6.2)  | 1       | 0           | 1 (7.7%)  | n.a.            | 1       |
| Other cardiopathies                 | 1 (7.1%)                 | 1 (10%)   | 0.7 (0.1-12.6) | 1       | 1 (10%)     | 1 (7.7%)  | 1.3 (0.1-24.3)  | 1       |
| Cerebral Stroke                     | 0                        | 1 (10%)   | n.a.           | 0.429   | 0           | 2 (15.4%) | n.a.            | 1       |
| Neoplasia                           | 0                        | 1 (10%)   | n.a.           | 0.429   | 0           | 2 (15.4%) | n.a.            | 1       |
| Vasoactive drugs                    | 8 (57.1%)                | 9 (90%)   | 0.6 (0.1-7.1)  | 0.218   | 4 (40%)     | 9 (69.2%) | 0.1 (0.05-1.05) | 0.057   |
| Antiviral Therapy                   |                          |           |                |         |             |           |                 |         |
| Hydroxychloroquine                  | 4 (28.6%)                | 3 (30%)   | 1 (0.1-6.2)    | 1       | 5 (50%)     | 5 (38.5%) | 1.2 (0.2-6.7)   | 1       |
| Lopinavir/ritonavir                 | 3 (21.4%)                | 3 (30%)   | 0.7 (0.1-4.5)  | 1       | 3 (30%)     | 2 (15.4%) | 1.9 (0.3-14.9)  | 0.635   |
| Steroids                            | 1 (7.1%)                 | 2 (20%)   | 0.4 (0.1-4.7)  | 0.566   | 5 (50%)     | 5 (38.5%) | 1.2 (0.2-6.7)   | 1       |
| Azitromicin                         | 3 (21.4%)                | 4 (40%)   | 0.4 (0.1-2.7)  | 0.397   | 2 (20%)     | 4 (30.8%) | 0.4 (0.1-3.2)   | 0.635   |
| ASA                                 | 1 (7.1%)                 | 1 (10%)   | 0.7 (0.1-13.5) | 1       | 0           | 2 (15.4%) | n.a.            | 0.476   |
| Heparin sodium 4000 IU/daily        | 1 (7.1%)                 | 3 (30%)   | 0.2 (0.2-2.2)  | 0.272   | 3 (30%)     | 2 (15.4%) | 1.7 (0.3-13.4)  | 1       |
| Heparin sodium 4000 IU b.i.d.       | 1 (7.1%)                 | 0         | n.a.           | 1       | 0           | 2 (15.4%) | n.a.            | 1       |
| Heparin calcium 25.000 IU/daily     | 1 (7.1%)                 | 0         | n.a.           | 1       | 1 (10%)     | 2 (15.4%) | 0.4 (0.1-3.2)   | 0.476   |
| O.A.T.                              | 1 (7.1%)                 | 0         | n.a.           | 1       | 0           | 2 (15.4%) | n.a.            | 1       |
| Pulmonary Embolism                  | 2 (14.3%)                | 1 (10%)   | 1.6 (0.2-21)   | 0.612   | 2 (20%)     | 4 (30.8%) | 0.5 (0.1-3.7)   | 0.642   |
| Acute Kidney failure                | 4 (28.6%)                | 6 (60%)   | 0.3 (0.1-1.6)  | 0.198   | 1 (10%)     | 2 (15.4%) | 0.6 (0.1-7.4)   | 0.479   |
| CRRT                                | 3 (21.4%)                | 1 (10%)   | 2.7 (0.3-31)   | 0.603   | 0           | 1 (7.7%)  | n.a.            | 1       |
| Acute liver failure                 | 4 (28.6%)                | 6 (60%)   | 0.3 (0.1-1.6)  | 0.198   | 1 (10%)     | 4 (30.8%) | 0.2 (0.1-2.4)   | 0.319   |
| Cerebral strokes                    | 1 (7.1%)                 | 1 (10%)   | 0.7 (0.1-13.5) | 1       | 1 (10%)     | 2 (15.4%) | 0.6 (0.1-7.4)   | 0.479   |
| Infection rate                      | 1 (7.1%)                 | 3 (23.1%) | 0.3 (0.1-3.8)  | 0.596   | 5 (50%)     | 4 (30.8%) | 1.1 (0.1-5.1)   | 0.637   |
| Septic shock                        | 1 (7.1%)                 | 4 (40%)   | 0.2 (0.1-2.4)  | 0.327   | 4 (40%)     | 3 (23.1%) | 1.1 (0.2-6.2)   | 0.663   |

Legend: in case of presence of slash /: at least 1 variable in each two way table upon which measures of association are computed is a constant; OR: the Mantel-Haenszel statistic is applied as well as the conditional assumption of independence. Data of categorical variables are given in percentage.

## Supplementary Material 2

### *Methods S1: Variable life adjustment display*

Variable life adjustment display (VLAD), is a type of indicator used to measure healthcare quality and patient outcomes (1). VLAD allows to ascertain the difference between expected mortality [indicated by SMR (standardised mortality rate) derived from SAPS II and recorded mortality]

1<sup>st</sup> 24 hrs. SAPS II is an all over the world well known and used score (2). Intensivists apply it to assess the probability of death of the patients upon the ICU admission. The score values range from 0 up to 150 (0 up to 100% of death probability). The increasing of death probability is exponential, according with the increasing of SAPS II. On the other hand, death probability upon ICU admission derived from SAPS II does not allow intensivist to take the decision of not to treat patients.

Once calculated the SAPS II intensivists may derived SMR (standardised mortality rate) that ranges from 0 to 1 and indicates the probability of death of that kind of patients meanwhile he/she is admitted to ICU.

SMR is calculated from SAPS II from the following exponential equation:

Hospital mortality may be calculated using the following equations (2):

$$\text{logit} = -7.7631 + 0.0737 * (\text{SAPS II}) + 0.9971 * \ln(\text{Score} + 1)$$

$$\text{Mortality (SMR)} = \frac{e^{\text{logit}}}{1 + e^{\text{logit}}}$$

Following on this we computed VLAD (1) to assess differences between expected and observed deaths.

#### VLAD

*Example A):* SMR is < 0.5, i.e., = 0.15, i.e., 15% of death likelihood, considering that such a mortality is very low:

A<sub>1</sub>) if the patient survives, we gain 0.15 points of life corresponding to the death likelihood, therefore VLAD = +0.15

A<sub>2</sub>) if the patient dies, we lose points of life corresponding to the survive probability, therefore VLAD = - 0.85

*Example B):* SMR is > 0.5, i.e., = 0.75, i.e. 75% of death likelihood, considering that such a mortality is very high:

B<sub>1</sub>) if the patient survives, we gain 0.75 points of life corresponding to the death likelihood, therefore VLAD = + 0.75

B<sub>2</sub>) if the patient dies, we lose points of life corresponding to the survive probability, therefore VLAD = - 0.15

Considering a number of patients admitted to an ICU we can sum up each VLAD of each patients; so far, we obtain a definitive a cumulative VLAD. If it is positive: observed mortality is higher than expected one, otherwise not. Moreover, in case of positive cumulative VLAD, cumulative lives saved in ICU are higher than those expected and predicted by SAPS II, otherwise not. In the former situation we can assess that ICU performance was better than in the latter one (negative cumulative VLAD).

### Supplementary Material 3

#### Methods 3: The Posology Algorithm

IgM/IgA enriched IgG are given at the dosage of 250 mg/ kg to be infused over 72 h.

The choice of dosage was made on the basis of a severity score summarised in the below table S5, calculated on the basis of the severity of the clinical picture, the basal serum values of Immunoglobulins and CD 4+, 8+ Lymphocytes, and according to the timing of the start of treatment with respect to onset of symptoms.

**Table S5.** Severity SCORE to implement the proper posology.

|                                                      |       |
|------------------------------------------------------|-------|
| IgA-G-M                                              | SCORE |
| • BETWEEN NORMALITY RANGE                            | 0     |
| • UNDER NORMALITY RANGE                              | 2     |
| LYMPHOCYTES CD 4+ - 8+                               | SCORE |
| • BETWEEN NORMALITY RANGE                            | 0     |
| • UNDER NORMALITY RANGE                              | 2     |
| DELTA-TIME FROM CLINICAL ONSET TO TREATMENT STARTING | SCORE |
| • < 12 ore                                           | 0     |
| • 12 – 24 ore                                        | 1     |
| • ≥ 24 ore                                           | 2     |
| SEVERITY OF ORGAN FAILURE                            | SCORE |
| • $4 \leq \text{SOFA} < 6$                           | 0     |
| • $6 \leq \text{SOFA} < 8$                           | 1     |
| • $\text{SOFA} \geq 8$                               | 2     |

For SCORE ≤ 2: IgM/IgA-enriched IgG at a dosage of 250 mg/kg over 72 h; For SCORE > 2 IgM/IgA-enriched IgG at a dosage of 500 mg / kg in 72 h.

In case of pre-existing renal insufficiency, we will use the baseline creatinine clearance value to proceed as follows (Table S5):

**Table S6.** Pentaglobin dosage in case of renal failure.

| Cr-Cl (mL/min)  | IgM/IgA – Enriched IgG<br>Posology (mg/kg) |
|-----------------|--------------------------------------------|
| Cr-Cl ≥ 50      | 500                                        |
| 50 < Cr-Cl < 30 | 250                                        |
| SCORE < 2       | To be individualised (*)                   |
| SCORE ≥ 2       | To be individualised (*)                   |
| Cr-Cl ≤ 30      | 250 undependently by SCORE                 |

**Legend: (\*)**: according with severity of clinical conditions.

## References

1. S1 Foltran, F.; Baldi, I.; Bertolini, G.; Merletti, F.; Gregori, D. Monitoring the performance of intensive care units using the variable life-adjusted display: a simulation study to explore its applicability and efficiency. *J. Evaluation Clin. Pr.* **2009**, *15*, 506–513, doi:10.1111/j.1365-2753.2008.01052.x.
2. S2 Le Gall, J.R. A new Simplified Acute Physiology Score (SAPS II) based on a European/North American multicenter study. *JAMA* **1993**, *270*, 2957–2963, doi:10.1001/jama.270.24.2957.
